# Supplementary material for: Integration of Transcriptome and Whole Genomic Resequencing Data to Identify Key Genes Affecting Swine Fat Deposition
Source: PLoS One. 2015 Apr 7;10(4):e0122396. doi: 10.1371/journal.pone.0122396 (PMC4388518; doi:10.1371/journal.pone.0122396)
Supplement: S3 Table — (XLS) [file pone.0122396.s004.xls]

## Sheet: Bio UP
Ensembl Gene ID	Gene Symbol	Homolog - Human Ens Gene ID	BH expression leve	BL expression level	prob
ENSSSCG00000000577	GYS2	ENSG00000111713	42.305	12.7511	0.84789
ENSSSCG00000002983	LGALS13	ENSG00000006659	15.3478	0.949442	0.884109
ENSSSCG00000004233	SMPDL3A	ENSG00000172594	135.544	58.3094	0.822803
ENSSSCG00000004454	ME1	ENSG00000065833	495.41	199.52	0.851543
ENSSSCG00000005638	LCN2	ENSG00000148346	440.454	139.419	0.883761
ENSSSCG00000006160	STMN2	ENSG00000104435	18.361	2.21482	0.873596
ENSSSCG00000006245	SDR16C5	ENSG00000170786	574.952	245.038	0.838638
ENSSSCG00000006793	LOC100621421; LOC100154001	-	46.6285	18.4341	0.810046
ENSSSCG00000008336	ANXA4	ENSG00000196975	339.18	121.968	0.866752
ENSSSCG00000008833	SGCB	ENSG00000163069	54.1699	21.5113	0.815098
ENSSSCG00000009216	SPP1	ENSG00000118785	161.467	47.4593	0.884396
ENSSSCG00000010190	ACTA1	ENSG00000143632	80.5366	25.3126	0.862178
ENSSSCG00000010554	SCD	ENSG00000099194	7330.69	1231.33	0.944598
ENSSSCG00000012059	HLCS	ENSG00000159267	158.274	73.3104	0.810428
ENSSSCG00000015025	CRYAB	ENSG00000109846	1072.11	488.903	0.828446
ENSSSCG00000015810	HTRA4	ENSG00000169495	11.9161	1.97376	0.811628
ENSSSCG00000016588	LEP	ENSG00000174697	60.2247	14.5687	0.88437
ENSSSCG00000017421	ACLY	ENSG00000131473	170.684	33.2868	0.922528
ENSSSCG00000017694	ACACA	ENSG00000132142	57.0936	17.5272	0.857195
ENSSSCG00000017801	TUSC5	ENSG00000184811	308.756	119.789	0.853725
ENSSSCG00000020745	THRSP; LOC100738008	ENSG00000151365	552.023	152.824	0.89911
ENSSSCG00000020980	-	-	53.6486	17.6359	0.842447
ENSSSCG00000021395	-	-	80.788	26.5298	0.855595
ENSSSCG00000024447	LOC100738008; THRSP	ENSG00000151365	546.667	150.681	0.899649
ENSSSCG00000025058	SLC11A1	ENSG00000018280	20.4546	5.43372	0.81815
ENSSSCG00000025541	ELOVL6	ENSG00000170522	264.862	79.3587	0.888587
ENSSSCG00000026805	-	-	135.855	63.6735	0.802758
ENSSSCG00000026923	LOC100517243	ENSG00000148671	1852.48	701.961	0.866413
ENSSSCG00000028204	TREH	ENSG00000118094	25.6529	8.24142	0.808732
ENSSSCG00000029944	FASN	ENSG00000169710	1497.68	523.329	0.876891
ENSSSCG00000030462	LOC100626333	ENSG00000162433	82.4152	34.1252	0.817533
ENSSSCG00000030522	-	ENSG00000187758	51.503	3.93224	0.94312
Probability: The higher the probability, the greater the change in expression between conditions

## Sheet: Bio Down
Ensembl Gene ID	Gene Symbol	Homolog - Human Ens Gene ID	BH expression level	BL expression level	prob
ENSSSCG00000000235	KRT82	ENSG00000161850	0.0158414	42.8165	0.959755
ENSSSCG00000000236	LOC100525745	ENSG00000170454	0.00795621	6.32639	0.80688
ENSSSCG00000000239	LOC100523670	ENSG00000170442	0.106716	316.515	0.992461
ENSSSCG00000000240	KRT85	ENSG00000135443	0.0290116	158.502	0.986495
ENSSSCG00000000247	K6-IRS1	ENSG00000170486	0.0125206	35.2788	0.952633
ENSSSCG00000000248	KRT5	ENSG00000186081	0.0107231	13.0094	0.890101
ENSSSCG00000000249	-	-	0.0319285	169.13	0.987191
ENSSSCG00000000250	KRT2	-	0.00974555	6.15823	0.803254
ENSSSCG00000000371	LOC100626164; LOC100739533	ENSG00000185664	0.121202	72.9311	0.97419
ENSSSCG00000000774	USP18	ENSG00000161133	23.6086	64.3188	0.834951
ENSSSCG00000001025	LOC100156744	ENSG00000096696	0.150863	10.5752	0.8655
ENSSSCG00000001390	PSORS1C2	ENSG00000204538	0.500275	35.0803	0.948911
ENSSSCG00000001952	NFKBIA	ENSG00000100906	166.394	343.325	0.804211
ENSSSCG00000002471	ISG12(A)	ENSG00000165949	208.359	461.645	0.826951
ENSSSCG00000002476	SERPINA1	ENSG00000197249	0.16137	20.0788	0.921684
ENSSSCG00000002623	GSTA2	-	0.100626	8.17865	0.837003
ENSSSCG00000002626	LOC100526118	-	0.0292081	16.1678	0.908432
ENSSSCG00000002882	LOC100515206	ENSG00000188508	0.0485329	16.6746	0.910119
ENSSSCG00000002993	LOC100738359	ENSG00000198077	46.337	109.665	0.820907
ENSSSCG00000003006	CYP2B22	ENSG00000197408	58.535	192.799	0.884152
ENSSSCG00000003562	SFN	ENSG00000175793	0.907761	81.2863	0.974034
ENSSSCG00000003754	LOC100522145	ENSG00000162365	0.0094606	41.3928	0.958564
ENSSSCG00000003832	LOC100510966	ENSG00000184292	0.0599171	7.86705	0.833455
ENSSSCG00000004754	LOC100524723	ENSG00000128965	10.0248	31.6614	0.823829
ENSSSCG00000004894	SERPINB5	ENSG00000206075	0.0778791	25.3243	0.937067
ENSSSCG00000005193	TYRP1	ENSG00000107165	0.00902098	16.6745	0.910797
ENSSSCG00000005206	LOC100520532	ENSG00000120215	0.0407839	11.263	0.874761
ENSSSCG00000005316	TPM2	ENSG00000198467	124.029	264.396	0.811654
ENSSSCG00000005474	SAL1	-	24.2454	63.9431	0.829672
ENSSSCG00000006276	LOC100153946	ENSG00000221869	223.135	477.346	0.820159
ENSSSCG00000006277	LOC100153946	ENSG00000164808	125.871	266.371	0.807898
ENSSSCG00000006297	LOC100516366	ENSG00000143196	224.621	502.144	0.828829
ENSSSCG00000006399	LOC100514765	ENSG00000243284	0.0344142	31.8059	0.948668
ENSSSCG00000006416	DARC	ENSG00000213088	109.941	228.651	0.803228
ENSSSCG00000006579	LOC100157925	ENSG00000188015	0.738624	253.536	0.99
ENSSSCG00000006719	HSD3B1	ENSG00000203859	3.31246	22.883	0.878022
ENSSSCG00000006919	GBP4	-	7.30174	30.1921	0.855517
ENSSSCG00000006924	GBP1	ENSG00000117228	62.7098	171.339	0.856569
ENSSSCG00000007007	IDO1	ENSG00000131203	0.294378	8.34112	0.83162
ENSSSCG00000007082	LOC100521590	ENSG00000125879	8.15293	25.2426	0.806663
ENSSSCG00000007227	ID1; LOC100622963	ENSG00000125968	108.402	358.081	0.890144
ENSSSCG00000007391	MATN4	ENSG00000124159	6.69058	22.4045	0.810593
ENSSSCG00000007501	BMP7	ENSG00000101144	0.620867	10.1328	0.843821
ENSSSCG00000007507	PCK1	ENSG00000124253	29.372	96.123	0.872352
ENSSSCG00000007977	LOC100737727	ENSG00000206177	1.93609	13.8278	0.838542
ENSSSCG00000007978	LOC100737768	ENSG00000188536	679.16	1411.21	0.814698
ENSSSCG00000008021	LOC100514571	ENSG00000131634	30.8368	75.9251	0.818515
ENSSSCG00000008203	LOC100736878; LOC100625243	ENSG00000211592	21.1689	101.639	0.907692
ENSSSCG00000008294	LOC100520667	ENSG00000163017	60.0382	150.137	0.840481
ENSSSCG00000008550	LOC100522014	ENSG00000138074	62.7665	187.676	0.868613
ENSSSCG00000008648	IRG6	ENSG00000134321	14.3556	54.5893	0.871665
ENSSSCG00000008664	LOC100518964	ENSG00000162981	0.436708	20.3707	0.91911
ENSSSCG00000008977	CXCL10	ENSG00000169245	31.9534	289.968	0.957407
ENSSSCG00000009148	LEF1	ENSG00000138795	0.74154	10.4779	0.84329
ENSSSCG00000009240	LOC100525175	ENSG00000145287	25.3296	84.7092	0.8715
ENSSSCG00000009490	DCT	ENSG00000080166	0.17278	11.5276	0.873943
ENSSSCG00000009631	PEBP4	ENSG00000134020	8.11713	29.8871	0.83849
ENSSSCG00000009672	SCARA5	ENSG00000168079	51.5883	115.305	0.811498
ENSSSCG00000009844	LOC100155338	ENSG00000152137	9.47073	34.5612	0.846125
ENSSSCG00000009881	OAS2	ENSG00000111335	16.6772	59.797	0.866752
ENSSSCG00000009882	OAS1	ENSG00000089127	46.3823	121.511	0.845708
ENSSSCG00000010041	-	-	188.928	475.308	0.853212
ENSSSCG00000010044	-	ENSG00000211675	210.549	446.335	0.812324
ENSSSCG00000010447	ACTA2	ENSG00000107796	348.472	765.114	0.827116
ENSSSCG00000012077	MX1	ENSG00000157601	65.7601	242.706	0.894283
ENSSSCG00000012082	-	-	4.52728	18.8616	0.823194
ENSSSCG00000012480	TNMD	ENSG00000000005	16.7583	42.6723	0.806828
ENSSSCG00000012771	SLC6A8	ENSG00000130821	33.1008	74.7964	0.802671
ENSSSCG00000012853	IRF7	ENSG00000185507	15.8974	49.5168	0.844195
ENSSSCG00000012960	LOC100622572; LOC100522360	ENSG00000175315	2.16951	18.8003	0.877665
ENSSSCG00000013067	PHEROC	-	0.156786	86.3015	0.977304
ENSSSCG00000013068	PHEROA	-	0.116766	49.062	0.963694
ENSSSCG00000013614	CNN1	ENSG00000130176	74.9255	194.502	0.851847
ENSSSCG00000014277	IRF1	ENSG00000125347	28.2312	85.8121	0.856734
ENSSSCG00000014564	IFITM1	ENSG00000142089	164.357	394.579	0.839481
ENSSSCG00000014565	LOC100519082; LOC100626247	ENSG00000142089	451.495	1093.73	0.847803
ENSSSCG00000014570	LOC100519788	ENSG00000175352	24.2771	65.904	0.834846
ENSSSCG00000014725	HBB	ENSG00000244734	558.739	1226.02	0.82889
ENSSSCG00000014727	LOC100515788	ENSG00000244734	134.955	291.032	0.817759
ENSSSCG00000015073	TAGLN	ENSG00000149591	537.204	1245.48	0.839507
ENSSSCG00000015126	TRIM29	ENSG00000137699	0.0571891	13.6463	0.893327
ENSSSCG00000015879	DAPL1	ENSG00000163331	1.84116	129.314	0.980417
ENSSSCG00000016199	-	ENSG00000135929	68.3975	183.859	0.855665
ENSSSCG00000016331	RAMP1	ENSG00000132329	16.4309	47.0444	0.830794
ENSSSCG00000017433	LOC100737113	ENSG00000186847	0.0102174	10.727	0.870674
ENSSSCG00000017437	KRT36	ENSG00000126337	0.0840494	7.54055	0.827055
ENSSSCG00000017438	LOC100514792	ENSG00000197079	0.0431083	39.7466	0.956842
ENSSSCG00000017439	KRT32	ENSG00000108759	0.0573426	42.1799	0.958912
ENSSSCG00000017441	KRT34	ENSG00000006059	0.0603866	210.606	0.989391
ENSSSCG00000017447	-	-	0.139935	34.5545	0.950798
ENSSSCG00000017448	LOC100515339	ENSG00000171345	2.17172	29.7448	0.922849
ENSSSCG00000017450	LOC100517674	ENSG00000212901	0.132868	136.356	0.984226
ENSSSCG00000017451	LOC100523088; LOC100523275; LOC100738100	ENSG00000204887	0.0274197	10.2224	0.865326
ENSSSCG00000017461	LOC100520694	ENSG00000173908	0.117012	12.6791	0.885066
ENSSSCG00000017462	KRT27	ENSG00000171446	0.230655	147.153	0.985008
ENSSSCG00000017464	LOC100524337	ENSG00000204897	0.280598	297.317	0.991756
ENSSSCG00000017508	STAC2	ENSG00000141750	1.19014	20.303	0.90571
ENSSSCG00000017589	LOC100516335	ENSG00000064195	0.424956	17.1743	0.906432
ENSSSCG00000017754	LGALS9	-	44.7944	107.771	0.824246
ENSSSCG00000017792	LOC100516758	-	15.0676	52.661	0.8607
ENSSSCG00000017887	XAF1	ENSG00000132530	12.2071	32.8984	0.802845
ENSSSCG00000021006	-	ENSG00000211890	5.92865	36.7686	0.897266
ENSSSCG00000021668	KRT31	ENSG00000131738	0.155229	435.773	0.994356
ENSSSCG00000021712	LOC100626657	ENSG00000138642	43.7004	99.6652	0.812307
ENSSSCG00000021755	HKA1	ENSG00000094796	0.109948	438.902	0.994435
ENSSSCG00000021804	LOC100624898	ENSG00000188694	0.0247079	11.0706	0.87343
ENSSSCG00000021873	CRABP1	ENSG00000166426	0.956129	10.6677	0.837012
ENSSSCG00000021903	LOC100626247	ENSG00000142089	338.499	856.152	0.857108
ENSSSCG00000022269	SPRP	ENSG00000169469	0.066308	75.9407	0.975303
ENSSSCG00000022422	LOC100739533	ENSG00000185664	0.113235	59.6179	0.969408
ENSSSCG00000022447	F3	ENSG00000117525	179.668	487.731	0.865456
ENSSSCG00000022657	LOC100523123	ENSG00000170523	0.126105	221.983	0.989721
ENSSSCG00000022796	LOC100738878	ENSG00000137038	9.35446	30.7109	0.830568
ENSSSCG00000022808	-	-	34.447	82.5667	0.815924
ENSSSCG00000022970	CYP27A1	ENSG00000135929	59.1333	160.345	0.854865
ENSSSCG00000023178	LOC100515875	ENSG00000168062	3.52872	17.1829	0.830359
ENSSSCG00000023212	PPP1R14A	ENSG00000167641	30.5347	73.0662	0.812176
ENSSSCG00000023305	-	-	0.73846	18.1752	0.905275
ENSSSCG00000023379	UBE2L6	ENSG00000156587	58.9489	168.258	0.861917
ENSSSCG00000023489	CXCL9	ENSG00000138755	33.2513	92.4147	0.847325
ENSSSCG00000023684	MT1A	-	64.0808	194.949	0.871178
ENSSSCG00000023706	CHIA	ENSG00000134216	0.190537	107.865	0.980843
ENSSSCG00000024230	MYL9	ENSG00000101335	340.863	716.122	0.813567
ENSSSCG00000024281	LGALS7	ENSG00000178934	0.519802	35.7243	0.949477
ENSSSCG00000024325	SGK2	ENSG00000101049	70.5991	157.949	0.817289
ENSSSCG00000024347	CRISP3	-	0.0197288	7.43526	0.827837
ENSSSCG00000024662	-	-	12.7385	34.1577	0.804593
ENSSSCG00000024867	ISG20	ENSG00000172183	1.42073	14.501	0.864274
ENSSSCG00000024911	LOC100739663	-	33.1721	93.1499	0.849577
ENSSSCG00000025468	LOC100158001	-	0.0467017	34.2927	0.951346
ENSSSCG00000025597	-	ENSG00000170442	0.0299571	77.6655	0.975938
ENSSSCG00000025789	LOC100518750	ENSG00000212724	0.0512867	25.1102	0.93705
ENSSSCG00000025823	-	ENSG00000188100	0.259493	11.3925	0.870526
ENSSSCG00000026339	LOC100153113; LOC100155089	ENSG00000189090	3.93279	65.4997	0.954929
ENSSSCG00000026669	LOC100519107	ENSG00000212724	0.0512867	32.8075	0.949677
ENSSSCG00000026850	MMRN2	ENSG00000173269	18.8924	52.3843	0.829638
ENSSSCG00000027097	LOC100621276	ENSG00000188015	0.320933	129.616	0.983182
ENSSSCG00000027332	-	ENSG00000211619	7.10582	32.5425	0.86823
ENSSSCG00000027544	-	-	45.3709	98.8222	0.802689
ENSSSCG00000027982	ISG15	ENSG00000187608	20.7369	97.9689	0.906562
ENSSSCG00000028321	LOC100624997	ENSG00000197683	0.0534438	56.4709	0.968303
ENSSSCG00000028334	KRT74	ENSG00000170484	0.00912272	39.1514	0.956625
ENSSSCG00000028448	LOC100739583	ENSG00000002549	218.714	455.336	0.809541
ENSSSCG00000028736	LOC100627004	ENSG00000142089	313.973	693.148	0.827794
ENSSSCG00000029038	LOC100622426; LOC100623597; LOC100623393	ENSG00000187766	0.0169695	7.80118	0.833925
ENSSSCG00000029058	C14H10orf116; LOC100517243	ENSG00000148671	732.449	3661.96	0.935267
ENSSSCG00000029278	-	-	0.0305238	72.6882	0.974573
ENSSSCG00000029545	-	ENSG00000111291	0.805947	33.219	0.944763
ENSSSCG00000029592	LOC100624186	ENSG00000013588	15.1232	47.5829	0.843421
ENSSSCG00000029835	LOC100518930	ENSG00000213417	0.103574	50.6853	0.96466
ENSSSCG00000029879	LTF	ENSG00000012223	0.068087	12.5744	0.885344
ENSSSCG00000030300	MT-2B	-	333.669	1063.45	0.888848
ENSSSCG00000030350	LOC100623387	ENSG00000094796	0.11022	367.202	0.9934
ENSSSCG00000030368	HSP70.2	-	111.214	238.562	0.814272
ENSSSCG00000030447	AKR1C1; LOC100738604	-	0.0292248	20.7064	0.925397
ENSSSCG00000030548	LOC100518083	ENSG00000138646	5.59165	21.5167	0.823646
Probability: The higher the probability, the greater the change in expression between conditions
