# Supplementary material for: Integration of Transcriptome and Whole Genomic Resequencing Data to Identify Key Genes Affecting Swine Fat Deposition
Source: PLoS One. 2015 Apr 7;10(4):e0122396. doi: 10.1371/journal.pone.0122396 (PMC4388518; doi:10.1371/journal.pone.0122396)
Supplement: S5 Table — (XLSX) [file pone.0122396.s006.xlsx]

## Sheet: UP BP
Term	PValue	Count	Genes
GO:0010033~response to organic substance	1.50168e-05	9	ENSG00000162433, ENSG00000109846, ENSG00000065833, ENSG00000018280, ENSG00000111713, ENSG00000118785, ENSG00000132142, ENSG00000174697, ENSG00000143632
GO:0006633~fatty acid biosynthetic process	0.000312048	4	ENSG00000099194, ENSG00000170522, ENSG00000132142, ENSG00000169710
GO:0006631~fatty acid metabolic process	0.000316955	5	ENSG00000099194, ENSG00000170522, ENSG00000132142, ENSG00000174697, ENSG00000169710
GO:0009719~response to endogenous stimulus	0.000505444	6	ENSG00000162433, ENSG00000109846, ENSG00000065833, ENSG00000118785, ENSG00000174697, ENSG00000143632
GO:0008610~lipid biosynthetic process	0.00197265	5	ENSG00000099194, ENSG00000170522, ENSG00000132142, ENSG00000131473, ENSG00000169710
GO:0046394~carboxylic acid biosynthetic process	0.00220799	4	ENSG00000099194, ENSG00000170522, ENSG00000132142, ENSG00000169710
GO:0016053~organic acid biosynthetic process	0.00220799	4	ENSG00000099194, ENSG00000170522, ENSG00000132142, ENSG00000169710
GO:0016042~lipid catabolic process	0.0030156	4	ENSG00000172594, ENSG00000174697, ENSG00000105205, ENSG00000105198
GO:0009725~response to hormone stimulus	0.00313549	5	ENSG00000109846, ENSG00000065833, ENSG00000118785, ENSG00000174697, ENSG00000143632
GO:0040008~regulation of growth	0.0193495	4	ENSG00000169495, ENSG00000109846, ENSG00000118785, ENSG00000174697
GO:0055114~oxidation reduction	0.0213406	5	ENSG00000099194, ENSG00000170786, ENSG00000065833, ENSG00000187758, ENSG00000169710, ENSG00000196616
GO:0006006~glucose metabolic process	0.0275233	3	ENSG00000109846, ENSG00000111713, ENSG00000174697
GO:0006732~coenzyme metabolic process	0.0275233	3	ENSG00000065833, ENSG00000132142, ENSG00000131473
GO:0019318~hexose metabolic process	0.0417056	3	ENSG00000109846, ENSG00000111713, ENSG00000174697
GO:0048545~response to steroid hormone stimulus	0.0417056	3	ENSG00000109846, ENSG00000118785, ENSG00000143632
GO:0001558~regulation of cell growth	0.0424945	3	ENSG00000169495, ENSG00000109846, ENSG00000118785
GO:0051186~cofactor metabolic process	0.0428911	3	ENSG00000065833, ENSG00000132142, ENSG00000131473
GO:0008361~regulation of cell size	0.047346	3	ENSG00000109846, ENSG00000118785, ENSG00000143632
GO:0007517~muscle organ development	0.0494256	3	ENSG00000109846, ENSG00000163069, ENSG00000143632
GO:0009991~response to extracellular stimulus	0.0532523	3	ENSG00000118785, ENSG00000174697, ENSG00000143632
GO:0005996~monosaccharide metabolic process	0.0541169	3	ENSG00000109846, ENSG00000111713, ENSG00000174697
GO:0006112~energy reserve metabolic process	0.0706629	2	ENSG00000111713, ENSG00000174697
GO:0032535~regulation of cellular component size	0.0767924	3	ENSG00000109846, ENSG00000118785, ENSG00000143632
GO:0032102~negative regulation of response to external stimulus	0.0817043	2	ENSG00000118785, ENSG00000174697
GO:0009743~response to carbohydrate stimulus	0.0972602	2	ENSG00000065833, ENSG00000111713

## Sheet: Up CC
Category	Term	PValue	Count	Genes
GOTERM_CC_FAT	GO:0005625~soluble fraction	0.00182033	5	ENSG00000109846, ENSG00000065833, ENSG00000104435, ENSG00000111713, ENSG00000132142
GOTERM_CC_FAT	GO:0032432~actin filament bundle	0.0438427	2	ENSG00000109846, ENSG00000143632
GOTERM_CC_FAT	GO:0005829~cytosol	0.0712443	6	ENSG00000065833, ENSG00000159267, ENSG00000111713, ENSG00000187758, ENSG00000131473, ENSG00000169710, ENSG00000196616
GOTERM_CC_FAT	GO:0015629~actin cytoskeleton	0.0773632	3	ENSG00000109846, ENSG00000111713, ENSG00000143632

## Sheet: UP MF
Category	Term	PValue	Gene Count	Genes list
GOTERM_MF_FAT	GO:0004620~phospholipase activity	0.00711986	3	ENSG00000172594, ENSG00000105205, ENSG00000105198
GOTERM_MF_FAT	GO:0016298~lipase activity	0.0101958	3	ENSG00000172594, ENSG00000105205, ENSG00000105198
GOTERM_MF_FAT	GO:0004622~lysophospholipase activity	0.0183376	2	ENSG00000105205, ENSG00000105198
GOTERM_MF_FAT	GO:0043531~ADP binding	0.0288865	2	ENSG00000065833, ENSG00000143632
GOTERM_MF_FAT	GO:0005529~sugar binding	0.0357113	3	ENSG00000006659, ENSG00000105205, ENSG00000105198
GOTERM_MF_FAT	GO:0032559~adenyl ribonucleotide binding	0.0718995	6	ENSG00000162433, ENSG00000065833, ENSG00000159267, ENSG00000132142, ENSG00000131473, ENSG00000143632
GOTERM_MF_FAT	GO:0030554~adenyl nucleotide binding	0.0860677	6	ENSG00000162433, ENSG00000065833, ENSG00000159267, ENSG00000132142, ENSG00000131473, ENSG00000143632
GOTERM_MF_FAT	GO:0001883~purine nucleoside binding	0.0906033	6	ENSG00000162433, ENSG00000065833, ENSG00000159267, ENSG00000132142, ENSG00000131473, ENSG00000143632
GOTERM_MF_FAT	GO:0001882~nucleoside binding	0.0927259	6	ENSG00000162433, ENSG00000065833, ENSG00000159267, ENSG00000132142, ENSG00000131473, ENSG00000143632

## Sheet: Down BP
Term	PValue	Gene Count	Genes	List Total	Pop Hits	Pop Total	Fold Enrichment
GO:0008544~epidermis development	2.06905e-12	16	ENSG00000138795, ENSG00000080166, ENSG00000186081, ENSG00000096696, ENSG00000169474, ENSG00000170523, ENSG00000175315, ENSG00000175793, ENSG00000131737, ENSG00000108759, ENSG00000169469, ENSG00000204897, ENSG00000094796, ENSG00000171446, ENSG00000135443, ENSG00000186847	95	184	13528	12.3826
GO:0007398~ectoderm development	6.45488e-12	16	ENSG00000138795, ENSG00000080166, ENSG00000186081, ENSG00000096696, ENSG00000169474, ENSG00000170523, ENSG00000175315, ENSG00000175793, ENSG00000131737, ENSG00000108759, ENSG00000169469, ENSG00000204897, ENSG00000094796, ENSG00000171446, ENSG00000135443, ENSG00000186847	95	199	13528	11.4492
GO:0006955~immune response	7.65378e-05	16	ENSG00000111335, ENSG00000134216, ENSG00000211890, ENSG00000128322, ENSG00000138755, ENSG00000211895, ENSG00000089127, ENSG00000012223, ENSG00000142089, ENSG00000185201, ENSG00000211679, ENSG00000117228, ENSG00000134321, ENSG00000211677, ENSG00000211592, ENSG00000169245, ENSG00000117226	95	690	13528	3.30203
GO:0030855~epithelial cell differentiation	0.000379247	7	ENSG00000101144, ENSG00000186081, ENSG00000096696, ENSG00000169474, ENSG00000175793, ENSG00000169469, ENSG00000186847	95	137	13528	7.27591
GO:0042438~melanin biosynthetic process	0.00130169	3	ENSG00000185664, ENSG00000080166, ENSG00000107165	95	8	13528	53.4
GO:0006582~melanin metabolic process	0.00166603	3	ENSG00000185664, ENSG00000080166, ENSG00000107165	95	9	13528	47.4667
GO:0060429~epithelium development	0.00498836	7	ENSG00000101144, ENSG00000186081, ENSG00000096696, ENSG00000169474, ENSG00000175793, ENSG00000169469, ENSG00000186847	95	227	13528	4.39119
GO:0009615~response to virus	0.00697906	5	ENSG00000172183, ENSG00000134321, ENSG00000157601, ENSG00000185507, ENSG00000187608	95	109	13528	6.53211
GO:0030216~keratinocyte differentiation	0.0108419	4	ENSG00000096696, ENSG00000169474, ENSG00000175793, ENSG00000169469	95	66	13528	8.6303
GO:0009913~epidermal cell differentiation	0.0137161	4	ENSG00000096696, ENSG00000169474, ENSG00000175793, ENSG00000169469	95	72	13528	7.91111
GO:0018149~peptide cross-linking	0.0139307	3	ENSG00000096696, ENSG00000169474, ENSG00000169469	95	26	13528	16.4308
GO:0019748~secondary metabolic process	0.0175672	4	ENSG00000185664, ENSG00000080166, ENSG00000107165, ENSG00000131203	95	79	13528	7.21013
GO:0006954~inflammatory response	0.0256254	7	ENSG00000213088, ENSG00000185507, ENSG00000117525, ENSG00000197249, ENSG00000169245, ENSG00000131203, ENSG00000138755	95	325	13528	3.06708
GO:0006952~defense response	0.0269286	10	ENSG00000012223, ENSG00000213088, ENSG00000134321, ENSG00000157601, ENSG00000185507, ENSG00000117525, ENSG00000197249, ENSG00000169245, ENSG00000131203, ENSG00000138755	95	615	13528	2.31545
GO:0046148~pigment biosynthetic process	0.0299676	3	ENSG00000185664, ENSG00000080166, ENSG00000107165	95	39	13528	10.9538
GO:0055114~oxidation reduction	0.0332838	10	ENSG00000197838, ENSG00000203857, ENSG00000162365, ENSG00000203859, ENSG00000107165, ENSG00000135929, ENSG00000197408, ENSG00000198077, ENSG00000187048, ENSG00000131203	95	639	13528	2.22848
GO:0032020~ISG15-protein conjugation	0.0342683	2	ENSG00000156587, ENSG00000187608	95	5	13528	56.96
GO:0042440~pigment metabolic process	0.0389828	3	ENSG00000185664, ENSG00000080166, ENSG00000107165	95	45	13528	9.49333
GO:0032438~melanosome organization	0.0608442	2	ENSG00000185664, ENSG00000107165	95	9	13528	31.6444
GO:0014829~vascular smooth muscle contraction	0.0608442	2	ENSG00000163017, ENSG00000107796	95	9	13528	31.6444
GO:0043473~pigmentation	0.0633259	3	ENSG00000185664, ENSG00000080166, ENSG00000107165	95	59	13528	7.24068
GO:0048753~pigment granule organization	0.0673743	2	ENSG00000185664, ENSG00000107165	95	10	13528	28.48
GO:0045109~intermediate filament organization	0.0673743	2	ENSG00000204897, ENSG00000186847	95	10	13528	28.48
GO:0009611~response to wounding	0.0755526	8	ENSG00000213088, ENSG00000096696, ENSG00000185507, ENSG00000117525, ENSG00000197249, ENSG00000169245, ENSG00000131203, ENSG00000138755	95	530	13528	2.14943
GO:0015671~oxygen transport	0.0866963	2	ENSG00000206177, ENSG00000188536, ENSG00000206172	95	13	13528	21.9077
GO:0031349~positive regulation of defense response	0.0914667	3	ENSG00000100906, ENSG00000185507, ENSG00000131203	95	73	13528	5.85205

## Sheet: Down CC
Term	PValue	Gene Count	Genes list
GO:0005882~intermediate filament	4.47236e-37	35	ENSG00000187766, ENSG00000186081, ENSG00000221859, ENSG00000221837, ENSG00000212901, ENSG00000205441, ENSG00000131737, ENSG00000108759, ENSG00000170484, ENSG00000188694, ENSG00000171345, ENSG00000170486, ENSG00000171446, ENSG00000197683, ENSG00000205445, ENSG00000205426, ENSG00000189169, ENSG00000135443, ENSG00000186847, ENSG00000173908, ENSG00000188155, ENSG00000213417, ENSG00000170523, ENSG0000…
GO:0045111~intermediate filament cytoskeleton	9.81846e-37	35	ENSG00000187766, ENSG00000186081, ENSG00000221859, ENSG00000221837, ENSG00000212901, ENSG00000205441, ENSG00000131737, ENSG00000108759, ENSG00000170484, ENSG00000188694, ENSG00000171345, ENSG00000170486, ENSG00000171446, ENSG00000197683, ENSG00000205445, ENSG00000205426, ENSG00000189169, ENSG00000135443, ENSG00000186847, ENSG00000173908, ENSG00000188155, ENSG00000213417, ENSG00000170523, ENSG0000…
GO:0045095~keratin filament	4.87306e-27	23	ENSG00000187766, ENSG00000186081, ENSG00000221859, ENSG00000212901, ENSG00000221837, ENSG00000205441, ENSG00000170484, ENSG00000170486, ENSG00000197683, ENSG00000205445, ENSG00000205426, ENSG00000189169, ENSG00000135443, ENSG00000186847, ENSG00000188155, ENSG00000213417, ENSG00000212724, ENSG00000170523, ENSG00000212725, ENSG00000170442, ENSG00000161850, ENSG00000212935, ENSG00000214518, ENSG0000…
GO:0044430~cytoskeletal part	6.48289e-16	38	ENSG00000187766, ENSG00000186081, ENSG00000221859, ENSG00000212901, ENSG00000221837, ENSG00000205441, ENSG00000101335, ENSG00000131737, ENSG00000108759, ENSG00000170484, ENSG00000188694, ENSG00000171345, ENSG00000170486, ENSG00000171446, ENSG00000197683, ENSG00000205445, ENSG00000205426, ENSG00000189169, ENSG00000135443, ENSG00000124253, ENSG00000186847, ENSG00000173908, ENSG00000188155, ENSG0000…
GO:0005856~cytoskeleton	3.63183e-15	44	ENSG00000187766, ENSG00000186081, ENSG00000221859, ENSG00000212901, ENSG00000221837, ENSG00000205441, ENSG00000101335, ENSG00000131737, ENSG00000169469, ENSG00000108759, ENSG00000170484, ENSG00000188694, ENSG00000171345, ENSG00000170486, ENSG00000197683, ENSG00000171446, ENSG00000205445, ENSG00000107796, ENSG00000205426, ENSG00000189169, ENSG00000135443, ENSG00000124253, ENSG00000186847, ENSG0000…
GO:0043232~intracellular non-membrane-bounded organelle	3.22732e-07	46	ENSG00000187766, ENSG00000138795, ENSG00000186081, ENSG00000221837, ENSG00000101335, ENSG00000205441, ENSG00000206172, ENSG00000108759, ENSG00000169469, ENSG00000170484, ENSG00000188694, ENSG00000170486, ENSG00000205445, ENSG00000189169, ENSG00000135443, ENSG00000124253, ENSG00000186847, ENSG00000163017, ENSG00000173908, ENSG00000188155, ENSG00000096696, ENSG00000169474, ENSG00000170442, ENSG0000…
GO:0043228~non-membrane-bounded organelle	3.22732e-07	46	ENSG00000187766, ENSG00000138795, ENSG00000186081, ENSG00000221837, ENSG00000101335, ENSG00000205441, ENSG00000206172, ENSG00000108759, ENSG00000169469, ENSG00000170484, ENSG00000188694, ENSG00000170486, ENSG00000205445, ENSG00000189169, ENSG00000135443, ENSG00000124253, ENSG00000186847, ENSG00000163017, ENSG00000173908, ENSG00000188155, ENSG00000096696, ENSG00000169474, ENSG00000170442, ENSG0000…
GO:0005792~microsome	0.000176836	10	ENSG00000197838, ENSG00000203857, ENSG00000162365, ENSG00000111335, ENSG00000203859, ENSG00000080166, ENSG00000197408, ENSG00000198077, ENSG00000187048, ENSG00000089127
GO:0042598~vesicular fraction	0.000219816	10	ENSG00000197838, ENSG00000203857, ENSG00000162365, ENSG00000111335, ENSG00000203859, ENSG00000080166, ENSG00000197408, ENSG00000198077, ENSG00000187048, ENSG00000089127
GO:0001533~cornified envelope	0.000803703	4	ENSG00000096696, ENSG00000169474, ENSG00000175315, ENSG00000169469
GO:0044449~contractile fiber part	0.015362	5	ENSG00000163017, ENSG00000171345, ENSG00000107796, ENSG00000101335, ENSG00000198467
GO:0030868~smooth endoplasmic reticulum membrane	0.016828	2	ENSG00000203857, ENSG00000203859
GO:0043292~contractile fiber	0.0192636	5	ENSG00000163017, ENSG00000171345, ENSG00000107796, ENSG00000101335, ENSG00000198467
GO:0005789~endoplasmic reticulum membrane	0.0264587	7	ENSG00000197838, ENSG00000203857, ENSG00000185664, ENSG00000203859, ENSG00000120215, ENSG00000197408, ENSG00000187048
GO:0005615~extracellular space	0.0298325	12	ENSG00000134216, ENSG00000206075, ENSG00000187608, ENSG00000175793, ENSG00000205076, ENSG00000117525, ENSG00000132329, ENSG00000138755, ENSG00000101144, ENSG00000173269, ENSG00000197249, ENSG00000169245, ENSG00000178934
GO:0042175~nuclear envelope-endoplasmic reticulum network	0.0332555	7	ENSG00000197838, ENSG00000203857, ENSG00000185664, ENSG00000203859, ENSG00000120215, ENSG00000197408, ENSG00000187048
GO:0030485~smooth muscle contractile fiber	0.0333755	2	ENSG00000163017, ENSG00000107796
GO:0048770~pigment granule	0.0394847	4	ENSG00000185664, ENSG00000080166, ENSG00000107165, ENSG00000120215
GO:0042470~melanosome	0.0394847	4	ENSG00000185664, ENSG00000080166, ENSG00000107165, ENSG00000120215
GO:0005790~smooth endoplasmic reticulum	0.0735466	2	ENSG00000203857, ENSG00000203859
GO:0044432~endoplasmic reticulum part	0.0736263	7	ENSG00000197838, ENSG00000203857, ENSG00000185664, ENSG00000203859, ENSG00000120215, ENSG00000197408, ENSG00000187048
GO:0005624~membrane fraction	0.079567	12	ENSG00000197838, ENSG00000203857, ENSG00000162365, ENSG00000111335, ENSG00000203859, ENSG00000080166, ENSG00000211890, ENSG00000197408, ENSG00000138074, ENSG00000198077, ENSG00000187048, ENSG00000089127
GO:0005626~insoluble fraction	0.096742	12	ENSG00000197838, ENSG00000203857, ENSG00000162365, ENSG00000111335, ENSG00000203859, ENSG00000080166, ENSG00000211890, ENSG00000197408, ENSG00000138074, ENSG00000198077, ENSG00000187048, ENSG00000089127
GO:0005833~hemoglobin complex	0.0968507	2	ENSG00000206177, ENSG00000188536, ENSG00000206172

## Sheet: Down MF
Category	Term	PValue	Gene Count	Genes list
GOTERM_MF_FAT	GO:0005198~structural molecule activity	1.76393e-12	26	ENSG00000186081, ENSG00000212901, ENSG00000101335, ENSG00000131737, ENSG00000108759, ENSG00000169469, ENSG00000171345, ENSG00000170486, ENSG00000171446, ENSG00000205426, ENSG00000135443, ENSG00000186847, ENSG00000173908, ENSG00000096696, ENSG00000169474, ENSG00000170523, ENSG00000126337, ENSG00000170442, ENSG00000161850, ENSG00000204897, ENSG00000197079, ENSG00000094796, ENSG00000006059, ENSG0000…
GOTERM_MF_FAT	GO:0020037~heme binding	2.57202e-06	9	ENSG00000197838, ENSG00000162365, ENSG00000206177, ENSG00000135929, ENSG00000197408, ENSG00000188536, ENSG00000198077, ENSG00000187048, ENSG00000206172, ENSG00000131203
GOTERM_MF_FAT	GO:0046906~tetrapyrrole binding	4.15621e-06	9	ENSG00000197838, ENSG00000162365, ENSG00000206177, ENSG00000135929, ENSG00000197408, ENSG00000188536, ENSG00000198077, ENSG00000187048, ENSG00000206172, ENSG00000131203
GOTERM_MF_FAT	GO:0005506~iron ion binding	1.34212e-05	12	ENSG00000197838, ENSG00000168079, ENSG00000206177, ENSG00000206172, ENSG00000012223, ENSG00000162365, ENSG00000134321, ENSG00000135929, ENSG00000188536, ENSG00000197408, ENSG00000198077, ENSG00000187048, ENSG00000131203
GOTERM_MF_FAT	GO:0019825~oxygen binding	1.38414e-05	6	ENSG00000206177, ENSG00000197408, ENSG00000188536, ENSG00000198077, ENSG00000187048, ENSG00000206172, ENSG00000131203
GOTERM_MF_FAT	GO:0005200~structural constituent of cytoskeleton	0.00201369	5	ENSG00000094796, ENSG00000171345, ENSG00000186081, ENSG00000096696, ENSG00000186847
GOTERM_MF_FAT	GO:0030280~structural constituent of epidermis	0.00224741	3	ENSG00000126337, ENSG00000161850, ENSG00000186847
GOTERM_MF_FAT	GO:0016863~intramolecular oxidoreductase activity, transposing C=C bonds	0.00445992	3	ENSG00000203857, ENSG00000203859, ENSG00000080166
GOTERM_MF_FAT	GO:0009055~electron carrier activity	0.00533618	7	ENSG00000197838, ENSG00000162365, ENSG00000135929, ENSG00000197408, ENSG00000198077, ENSG00000187048, ENSG00000131203
GOTERM_MF_FAT	GO:0003823~antigen binding	0.00772266	4	ENSG00000211679, ENSG00000211677, ENSG00000211890, ENSG00000211592, ENSG00000211895
GOTERM_MF_FAT	GO:0070330~aromatase activity	0.0139634	3	ENSG00000197838, ENSG00000197408, ENSG00000198077
GOTERM_MF_FAT	GO:0018685~alkane 1-monooxygenase activity	0.0144286	2	ENSG00000162365, ENSG00000187048
GOTERM_MF_FAT	GO:0016712~oxidoreductase activity, acting on paired donors, with incorporation or reduction of molecular oxygen, reduced flavin or flavoprotein as one donor, and incorporation of one atom of oxygen	0.0197794	3	ENSG00000197838, ENSG00000197408, ENSG00000198077
GOTERM_MF_FAT	GO:0004769~steroid delta-isomerase activity	0.0215655	2	ENSG00000203857, ENSG00000203859
GOTERM_MF_FAT	GO:0016860~intramolecular oxidoreductase activity	0.0307971	3	ENSG00000203857, ENSG00000203859, ENSG00000080166
GOTERM_MF_FAT	GO:0016713~oxidoreductase activity, acting on paired donors, with incorporation or reduction of molecular oxygen, reduced iron-sulfur protein as one donor, and incorporation of one atom of oxygen	0.0356862	2	ENSG00000162365, ENSG00000187048
GOTERM_MF_FAT	GO:0008307~structural constituent of muscle	0.0370254	3	ENSG00000171345, ENSG00000101335, ENSG00000198467
GOTERM_MF_FAT	GO:0003854~3-beta-hydroxy-delta5-steroid dehydrogenase activity	0.05649	2	ENSG00000203857, ENSG00000203859
GOTERM_MF_FAT	GO:0005344~oxygen transporter activity	0.0901807	2	ENSG00000206177, ENSG00000188536, ENSG00000206172
